# Supplementary material
Source: PubMed Central journal article supplement (PMC8860873)
Supplement: NIHMS1775867-supplement-1.pdf [file NIHMS1775867-supplement-1.pdf]

**Supplemental Table 1.** Adipogenesis gene array results

| <b>Name</b>                                    | <b>Symbol</b> | <b>Fold Change</b> |
|------------------------------------------------|---------------|--------------------|
| Acetyl-Coenzyme A carboxylase beta             | Acacb         | 1.209              |
| Adipogenin                                     | Adig          | 0.976              |
| Adiponectin, CIQ and collagen domain binding   | Adipoq        | 0.916              |
| Adrenergic receptor beta 2                     | Adrb2         | 1.180              |
| Angiotensinogen                                | Agt           | 0.734              |
| Angiopoietin 2                                 | Angpt2        | 0.699              |
| Axin 1                                         | Axin1         | 0.569              |
| Bone morphogenetic protein 2                   | Bmp2          | 0.991              |
| Bone morphogenetic protein 4                   | Bmp4          | 1.103              |
| Bone morphogenetic protein 7                   | Bmp7          | 0.172              |
| Cyclin D1                                      | Ccnd1         | 1.179              |
| Cyclin-dependent kinase 4                      | Cdk4          | 0.721              |
| Cyclin-dependent kinase inhibitor 1A (P21)     | Cdkn1a        | 0.669              |
| Cyclin-dependent dependent kinase inhibitor 1B | Cdkn1b        | 0.491              |
| CCAAT/enhancer binding protein (C/EBP), alpha  | Cebpa         | 1.339              |
| CCAAT/enhancer binding protein (C/EBP), beta   | Cebpb         | 1.035              |
| CCAAT/enhancer binding protein (C/EBP), delta  | Cebpd         | 0.897              |
| Complement factor D                            | Cfd           | 1.077              |
| CAMP responsive binding protein 1              | Creb1         | 0.554              |
| DNA-damage inducible transcript 3              | Ddit3         | 0.844              |
| Deiodinase, iodothyronine type II              | Dio2          | 0.873              |
| Dickkopf homolog 1                             | Dkk1          | 4.234              |
| Delta-like 1 homolog                           | Dlk1          | 1.332              |
| E2F transcription factor 1                     | E2f1          | 0.413              |
| Early growth response 2                        | Egr2          | 0.560              |
| Fatty acid binding protein 4, adipocyte        | Fabp4         | 1.212              |
| Fatty acid synthase                            | Fasn          | 1.347              |
| Fibroblast growth factor 1                     | Fgf1          | 0.972              |
| Fibroblast growth factor 10                    | Fgf10         | 1.043              |
| Fibroblast growth factor 2                     | Fgf2          | 1.284              |
| Forkhead box C2                                | Foxc2         | 1.084              |
| Forkhead box O1                                | Foxo1         | 0.896              |
| GATA binding protein 2                         | Gata2         | 1.023              |
| GATA binding protein 3                         | Gata3         | 0.051              |
| Hairy and enhancer of split 1                  | Hes1          | 1.066              |
| Insulin receptor                               | Insr          | 0.947              |
| Insulin receptor substrate 1                   | Irs1          | 1.326              |
| Insulin receptor substrate 2                   | Irs2          | 1.825              |
| Jun oncogene                                   | Jun           | 1.566              |
| Kruppel-like factor 15                         | Klf15         | 0.702              |
| Kruppel-like factor 2                          | Klf2          | 1.766              |
| Kruppel-like factor 3                          | Klf3          | 0.672              |
| Kruppel-like factor 4                          | Klf4          | 1.445              |
| Leptin                                         | Lep           | 1.148              |
| Lipase, hormone sensitive                      | Lipe          | 1.191              |
| Lamin A                                        | Lmna          | 0.949              |
| Lipoprotein lipase                             | Lpl           | 1.072              |

|                                                                        |          |       |
|------------------------------------------------------------------------|----------|-------|
| Low density lipoprotein receptor-related protein 5                     | Lrp5     | 0.728 |
| Mitogen-activated protein kinase 14                                    | Mapk14   | 0.795 |
| Nuclear receptor coactivator 2                                         | Ncoa2    | 0.760 |
| Nuclear receptor co-repressor 2                                        | Ncor2    | 0.750 |
| Nuclear receptor subfamily 0, group B, member 2                        | Nr0b2    | 0.425 |
| Nuclear receptor subfamily 1, group H, member 3                        | Nr1h3    | 1.024 |
| Nuclear respiratory factor 1                                           | Nrf1     | 0.511 |
| Peroxisome proliferator activated receptor alpha                       | Ppara    | 1.116 |
| Peroxisome proliferator activated receptor delta                       | Ppard    | 0.822 |
| Peroxisome proliferator activated receptor gamma                       | Pparg    | 1.162 |
| Peroxisome proliferative activated receptor gamma, coactivator 1 alpha | Ppargc1a | 0.733 |
| Peroxisome proliferative activated receptor gamma, coactivator 1 beta  | Ppargc1b | 1.189 |
| PR domain containing 16                                                | Prdm16   | 1.315 |
| Retinoblastoma 1                                                       | Rb1      | 1.000 |
| Resistin                                                               | Retn     | 0.775 |
| Runt-related transcription factor 1                                    | Runx1t1  | 0.647 |
| Retinoid X receptor alpha                                              | Rxra     | 0.774 |
| Secreted frizzled-related protein 1                                    | Sfrp1    | 0.852 |
| Secreted frizzled-related sequence protein 5                           | Sfrp5    | 0.973 |
| Sonic hedgehog                                                         | Shh      | ND    |
| Sirtuin 1                                                              | Sirt1    | 0.817 |
| Sirtuin 2                                                              | Sirt2    | 0.907 |
| Sirtuin 3                                                              | Sirt3    | 1.074 |
| Solute carrier family 2, member 4                                      | Slc2a4   | 1.169 |
| Rous sarcoma oncogene                                                  | Src      | 0.480 |
| Sterol regulatory element binding transcription factor 1               | Srebf1   | 0.996 |
| Tafazzin                                                               | Taz      | 1.026 |
| Transcription factor 7-like 2, T-cell specific, HMG-box                | Tcf7l2   | 1.175 |
| TSC22 domain family, member 3                                          | Tsc22d3  | 0.641 |
| Twist homolog 1                                                        | Twist1   | 1.027 |
| Uncoupling protein 1                                                   | Ucp1     | 1.114 |
| Vitamin D receptor                                                     | Vdr      | 1.656 |
| Wingless-related MMTV integration site 1                               | Wnt1     | 0.407 |
| Wingless-related MMTV integration site 10b                             | Wnt10b   | 1.007 |
| Wingless-related MMTV integration site 3A                              | Wnt3a    | ND    |
| Wingless-related MMTV integration site 5A                              | Wnt5a    | 1.187 |
| Wingless-related MMTV integration site 5B                              | Wnt5b    | 0.596 |

Listed are the gene names, symbols and fold changes versus control as determined in samples obtained from mice consuming the 0.5 $\mu$ m beads at a dose of 1 $\mu$ g/ml. ND: not determined

**Supplemental Table 2. Raw and Trimmed Read Count per Sample**

| <b>Raw File Name</b>        | <b>Total Raw Reads</b> | <b>Trimmed File Name</b>            | <b>Total Trimmed Reads</b> |
|-----------------------------|------------------------|-------------------------------------|----------------------------|
| barcode01_17_Blue_all.fastq | 16,523                 | barcode01_17_Blue_all_chop.q9.fastq | 11,821                     |
| barcode02_18_Blue_all.fastq | 14,695                 | barcode02_18_Blue_all_chop.q9.fastq | 10,234                     |
| barcode04_19_Blue_all.fastq | 32,622                 | barcode04_19_Blue_all_chop.q9.fastq | 23,140                     |
| barcode05_20_Blue_all.fastq | 13,821                 | barcode05_20_Blue_all_chop.q9.fastq | 9,918                      |
| barcode07_21_Blue_all.fastq | 13,749                 | barcode07_21_Blue_all_chop.q9.fastq | 9,851                      |
| barcode08_22_Blue_all.fastq | 23,159                 | barcode08_22_Blue_all_chop.q9.fastq | 16,623                     |
| barcode09_23_Blue_all.fastq | 16,754                 | barcode09_23_Blue_all_chop.q9.fastq | 12,039                     |
| barcode10_24_Blue_all.fastq | 14,690                 | barcode10_24_Blue_all_chop.q9.fastq | 10,265                     |
| barcode11_25_Blue_all.fastq | 22,771                 | barcode11_25_Blue_all_chop.q9.fastq | 15,944                     |
| barcode12_26_Blue_all.fastq | 24,650                 | barcode12_26_Blue_all_chop.q9.fastq | 17,460                     |
| barcode13_19_Red_all.fastq  | 14,110                 | barcode13_19_Red_all_chop.q9.fastq  | 10,034                     |
| barcode14_20_Red_all.fastq  | 11,863                 | barcode14_20_Red_all_chop.q9.fastq  | 8,379                      |
| barcode15_21_Red_all.fastq  | 14,948                 | barcode15_21_Red_all_chop.q9.fastq  | 10,682                     |
| barcode16_22_Red_all.fastq  | 21,679                 | barcode16_22_Red_all_chop.q9.fastq  | 15,458                     |
| barcode17_23_Red_all.fastq  | 19,794                 | barcode17_23_Red_all_chop.q9.fastq  | 14,149                     |
| barcode18_24_Red_all.fastq  | 16,333                 | barcode18_24_Red_all_chop.q9.fastq  | 11,534                     |
| barcode21_25_Red_all.fastq  | 11,352                 | barcode21_25_Red_all_chop.q9.fastq  | 7,979                      |
| barcode22_26_Red_all.fastq  | 11,610                 | barcode22_26_Red_all_chop.q9.fastq  | 8,343                      |
| barcode23_27_Red_all.fastq  | 16,575                 | barcode23_27_Red_all_chop.q9.fastq  | 11,848                     |
| barcode24_28_Red_all.fastq  | 19,500                 | barcode24_28_Red_all_chop.q9.fastq  | 13,963                     |

**Supplemental Table 3.** Plasma lipid analysis

| Exposure    |                | Plasma lipid (mg/dL) |            |                   |               |
|-------------|----------------|----------------------|------------|-------------------|---------------|
| size        | dose           | HDL                  | LDL        | Total cholesterol | Triglycerides |
| -           | -              | 35.7 (2.2)           | 24.2 (1.3) | 71.3 (3.2)        | 57.2 (4.7)    |
| 5 $\mu$ m   | 0.1 $\mu$ g/ml | 37.4 (2.0)           | 19.5 (1.5) | 70.2 (2.8)        | 66.2 (4.4)    |
| 5 $\mu$ m   | 1.0 $\mu$ g/ml | 36.8 (2.4)           | 21.0 (2.1) | 71.0 (4.1)        | 65.9 (5.0)    |
| 0.5 $\mu$ m | 0.1 $\mu$ g/ml | 37.5 (1.6)           | 24.7 (0.7) | 73.8 (2.3)        | 58.0 (4.0)    |
| 0.5 $\mu$ m | 1.0 $\mu$ g/ml | 43.7 (2.0)*          | 26.2 (1.0) | 81.3 (2.9)        | 56.8 (3.0)    |

Listed are the levels of fasting plasma lipids in blood samples obtained from the experimental groups at termination. Values are presented as average (SE).

\*:  $p < 0.05$  vs control.

**Supplemental Table 4. Metabolic activity**

| Parameter                     | Control       | Exposed (0.5 $\mu$ m; 1.0 $\mu$ g/ml) |
|-------------------------------|---------------|---------------------------------------|
| <b>Intake</b>                 |               |                                       |
| Food / body wt ratio (g/kg)   | 90.3 (2.8)    | 76.1 (6.8)                            |
| Water / body wt ratio (ml/kg) | 107.9 (4.7)   | 90.8 (8.9)                            |
| <b>Respiration</b>            |               |                                       |
| VO <sub>2</sub> (ml/h/kg)     | 3723 (41)     | 3713 (86)                             |
| VCO <sub>2</sub> (ml/h/kg)    | 3274 (58)     | 3214 (96)                             |
| RER                           | 0.881 (0.011) | 0.869 (0.009)                         |
| <b>Activity</b>               |               |                                       |
| Heat (kcal/h/kg)              | 18.3 (0.2)    | 18.2 (0.5)                            |
| Total activity                | 677.0 (38.4)  | 698.3 (42.4)                          |
| Gross movements               | 495.2 (32.4)  | 518.7 (34.0)                          |
| Fine movements                | 181.8 (7.0)   | 179.6 (9.1)                           |

Listed are those parameters measured during the dark phase (6PM-6AM) of housing in metabolic cages. Values are expressed as avg (SE). RER: respiratory exchange ratio

**Supplemental Table 5: Effects of 12-week PS consumption (0.5µm) on aorta function *ex vivo*.**

| <u>Measurement</u>                     | <u>Treatment Group</u> |                 |                 |                 |
|----------------------------------------|------------------------|-----------------|-----------------|-----------------|
|                                        | <u>Control</u>         | <u>0.1µg/ml</u> | <u>1.0µg/ml</u> | <u>Combined</u> |
| <sup>1</sup> PE (10 µM)                | 6.75±1.21              | 5.51±1.62       | 4.98±1.43       | 5.25±1.02       |
| <sup>2</sup> PE EC <sub>50</sub> (nM)  | 61.6±10.7              | 32.7±5.4        | 37.7±10.3       | 35.2±5.5*       |
| <sup>3</sup> PE pD <sub>2</sub>        | 7.24±0.09              | 7.52±0.08       | 7.51±0.15       | 7.51±0.08       |
| <sup>4</sup> PE Contraction Ratio      | 1.35±0.07              | 1.28±0.04       | 1.37±0.09       | 1.33±0.05       |
| <sup>5</sup> ACh (% PE)                | -62.9±7.9              | -64.6±3.2       | -67.7±8.2       | -66.1±4.2       |
| <sup>2</sup> ACh EC <sub>50</sub> (nM) | 121±27                 | 389±169         | 182±70          | 286±93          |
| <sup>3</sup> ACh pD <sub>2</sub>       | 7.00±0.17              | 6.61±0.22       | 6.83±0.13       | 6.72±0.13       |
| <sup>5</sup> SNP (% PE)                | -98.8±0.4              | -99.1±0.6       | -98.6±0.6       | -98.8±0.4       |
| <sup>2</sup> SNP EC <sub>50</sub> (nM) | 8.6±1.4                | 9.7±1.2         | 10.7±2.0        | 10.2±1.1        |
| <sup>3</sup> SNP pD <sub>2</sub>       | 8.09±0.07              | 8.03±0.05       | 8.00±0.09       | 8.01±0.05       |

Data are mean ± SEM; n=5 mice per group or n=10 mice in “Combined” group. **Abbr.** PE, phenylephrine; ACh, acetylcholine; SNP, sodium nitroprusside; <sup>1</sup>mN/mm, <sup>2</sup>EC<sub>50</sub>, effective concentration producing 50% response (in nM); <sup>3</sup>pD<sub>2</sub>, -log [EC<sub>50</sub>]; <sup>4</sup>L-NAME+PE Tension/PE Tension; <sup>5</sup>agonist-induced relaxation as a percentage of PE-induced tension. \* P<0.05 vs. Control.

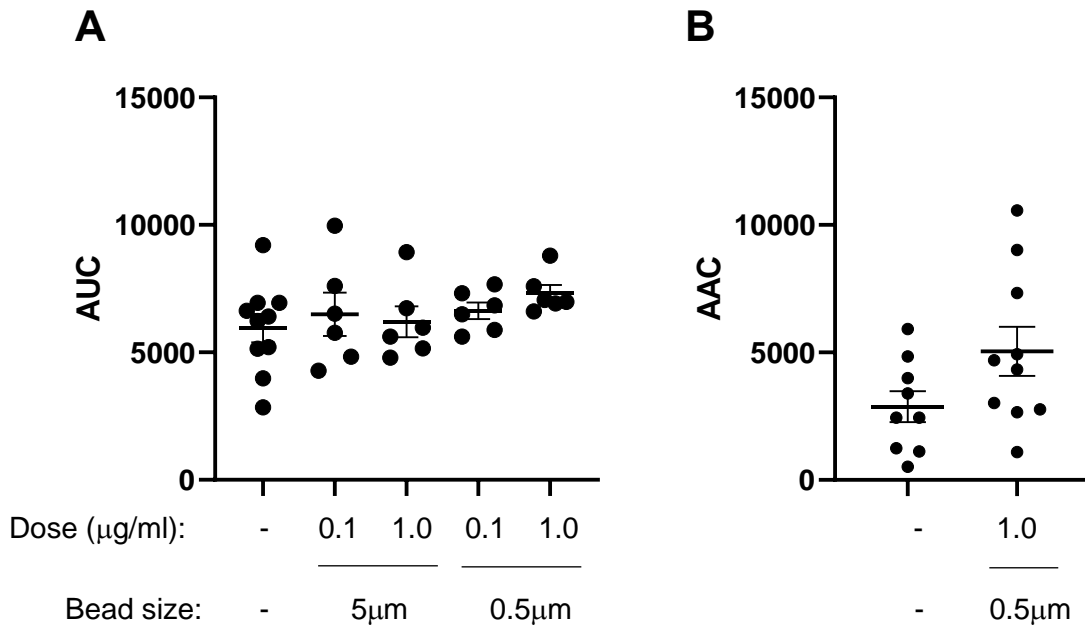

**Supplemental Figure 1. Glucose homeostasis.** A) Illustrated are the areas under the curve (AUC) calculated from glucose tolerance tests using mice from the 5 treatment groups after 9 weeks of exposure. B) Illustrated are areas above the curve (AAC) calculated from an insulin tolerance test using control mice and those mice ingesting  $0.5\mu\text{m}$  beads at a dose of  $1\mu\text{g/ml}$  for 12 weeks.

**A. Efficacy**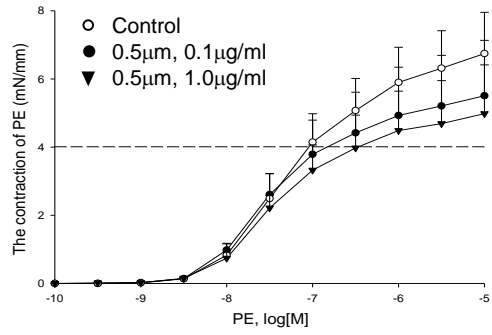**B. Sensitivity**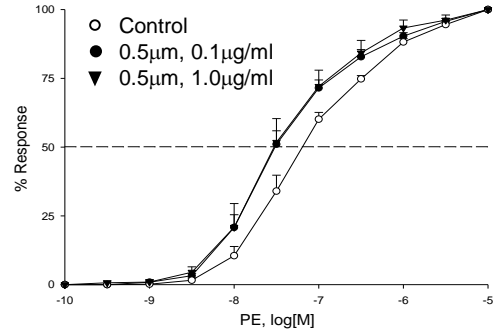**C.**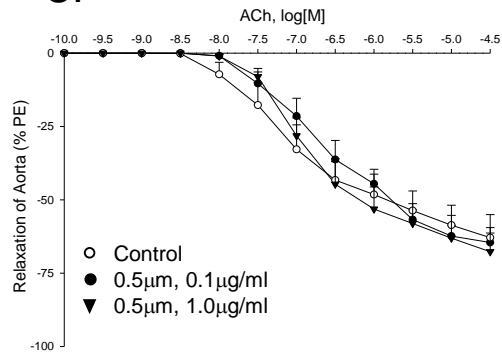**D.**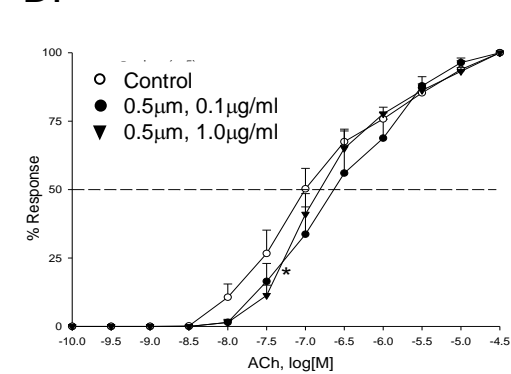**E.**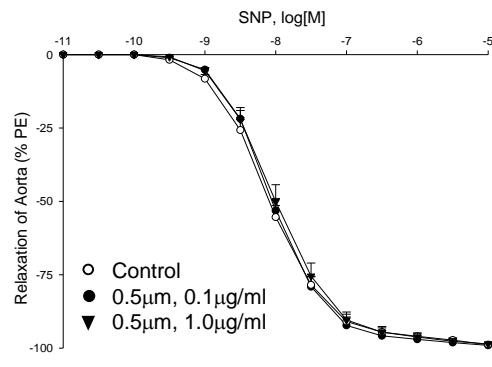**F.**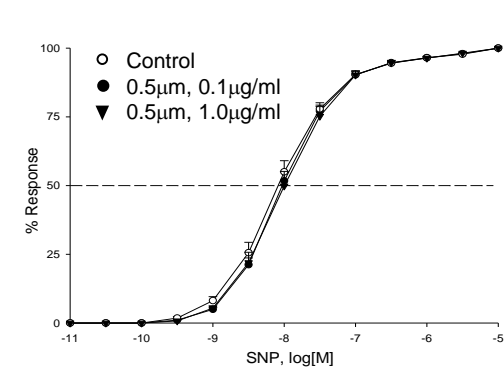

**Supplemental Figure 2. Effects of PS consumption on aortic function *ex vivo*.** Aortae were collected from control mice and those drinking PS-containing water of the indicated size and dose and used to analyze functional reactivity. A, B) Summary data of cumulative concentration-dependent phenylephrine- (PE) induced increase in isometric tension (mN/mm) in aortic rings (Efficacy) and as a % of the total response (Sensitivity). C, D) Summary data of cumulative concentration-dependent acetylcholine- (ACh) induced relaxation as a % of PE-induced tension in aortic rings (Efficacy) or as a % of the total response (Sensitivity). E, F) Summary data of cumulative concentration-dependent sodium nitroprusside- (SNP) induced relaxation as a % of PE-induced tension in aortic rings (Efficacy) or as a % of the total response (Sensitivity). Data are mean  $\pm$  SE. n=5 aorta per group.



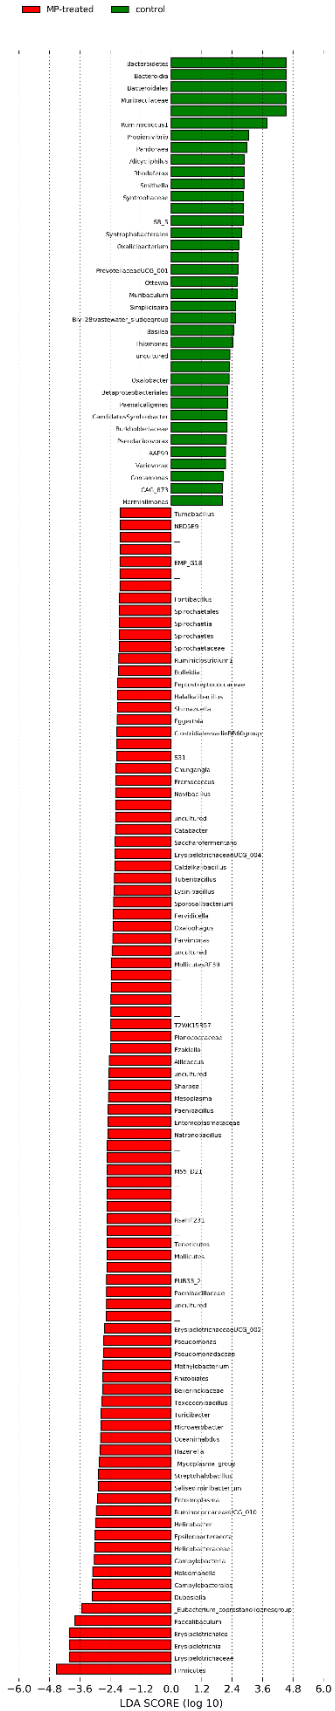

**Supplemental Figure 3. Genus level differences.** Illustrated are changes in gut microbiota at the genus level in mice drinking normal water (green) and that containing the PS beads (red).
